# Supplementary material for: Steep sulfur gradient in CZTSSe solar cells by H2S-assisted rapid surface sulfurization
Source: Royal Society of Chemistry journal article supplement (doi:10.1039/d1ra00494h), 2021-01-01
Supplement: d1ra00494h1.pdf [file d1ra00494h1.pdf]

## Supporting Information

### Steep Sulfur Gradient in CZTSSe Solar Cells by H<sub>2</sub>S-Assisted Rapid Surface Sulfurization

Teoman Taskesen\*, Devendra Pareek, Dirk Hauschild, Alan Haertel, Lothar Weinhardt, Wanli Yang, Timo Pfeiffelmann, David Nowak, Clemens Heske, Levent Gütay

\*Corresponding author e-mail: teoman.taskesen@uni-oldenburg.de

This Supporting Information section contains material to support the main hypotheses raised in the main manuscript.

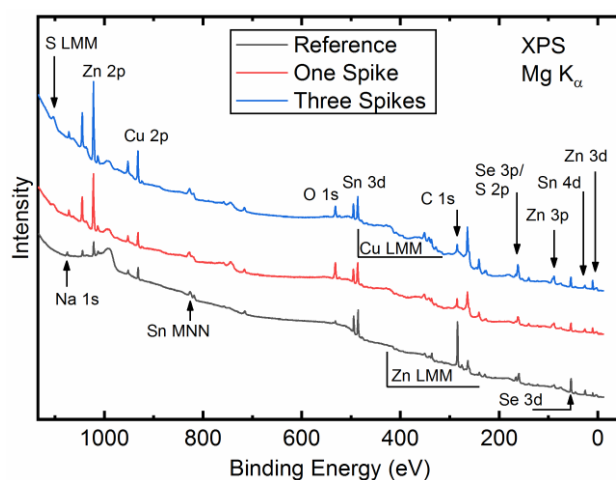

**Figure S1.** Mg K<sub>α</sub> XPS survey spectra of the CZTSe reference (black), one-spike (red), and three-spike (blue) samples. Prominent photoelectron and Auger features are labeled.

**Table S1:** Saturation current ( $J_0$ ), ideality factor ( $A$ ), shunt resistance ( $R_{sh}$ ), and series resistance ( $R_s$ ) of the best-performing devices from each H<sub>2</sub>S-assisted rapid surface sulfurization treatment. The analysis was performed with Shockley's one-diode model on the illuminated current-voltage curves.

| Sample        | $J_0$ (mA/cm <sup>2</sup> ) | $A$ | $R_{sh}$ (Ω.cm <sup>2</sup> ) | $R_s$ (Ω.cm <sup>2</sup> ) |
|---------------|-----------------------------|-----|-------------------------------|----------------------------|
| Reference     | 3.0E-02                     | 2.0 | 200                           | 0.05                       |
| 40%P          | 3.0E-02                     | 2.1 | 250                           | 0.05                       |
| 45%P          | 4.0E-02                     | 2.1 | 250                           | 0.05                       |
| 50%P          | 2.1E-01                     | 2.5 | 75                            | 0.05                       |
| 50%P+Selenium | 6.5E-02                     | 2.2 | 200                           | 0.05                       |
